# Supplementary material
Source: PubMed Central journal article supplement (PMC470713)

Deuteration

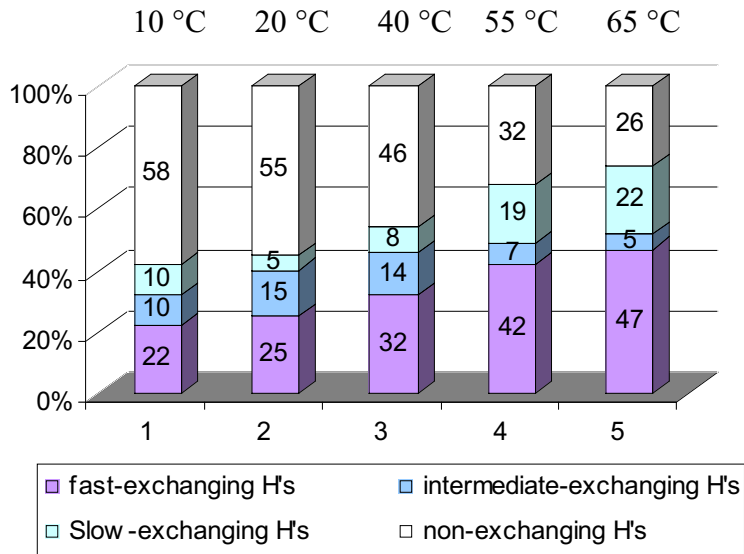

Supplement: pnas_101_26_9556__9.pdf [file pnas_101_26_9556__9.pdf]
